# Supplementary material for: Synthesis, structure, and characterization of new low-firing microwave dielectric ceramics: (Ca1−3xBi2xΦx)MoO4
Source: Royal Society of Chemistry journal article supplement (doi:10.1039/c4tc00698d), 2014-01-01
Supplement: c4tc00698d1.pdf [file c4tc00698d1.pdf]

†Electronic Supplementary Information (ESI) available: [X-ray diffraction patterns of CBM ceramics in the x range of 0.16-0.25].

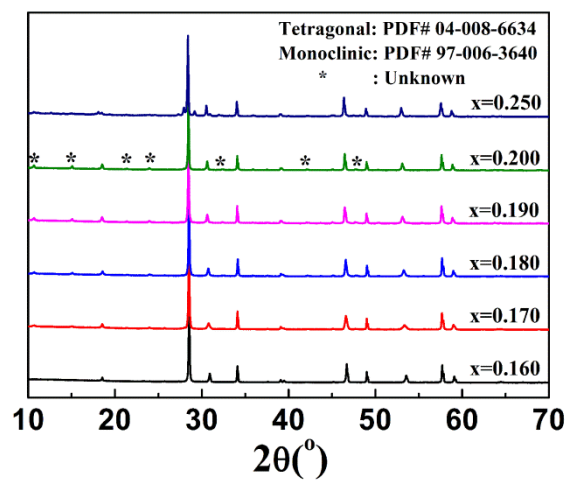

Figure S1 X-ray diffraction patterns of CBM ceramics in the x range of 0.16-0.25
